# Supplementary material for: The dehydration of N-acetylglucosamine (GlcNAc) to enantiopure dihydroxyethyl acetamidofuran (Di-HAF)
Source: Royal Society of Chemistry journal article supplement (doi:10.1039/d1ob02004h), 2021-01-01

## Supplemental Information: The dehydration of N-acetylglucosamine (GlcNAc) to enantiopure dihydroxyethyl acetamidofuran (Di-HAF)

### Contents

|                                                                                                  |          |
|--------------------------------------------------------------------------------------------------|----------|
| <b>Materials and methods .....</b>                                                               | <b>1</b> |
| S1. Reagents.....                                                                                | 1        |
| S2. Apparatus.....                                                                               | 1        |
| S3. Chiral LC method.....                                                                        | 2        |
| <b>Experimental procedures .....</b>                                                             | <b>2</b> |
| S4. Synthesis of Di-HAF on 5 g scale .....                                                       | 2        |
| S5. Synthesis of Di-HAF on 50 g scale .....                                                      | 2        |
| S6. Dehydration of ManAc to afford Di-HAF.....                                                   | 3        |
| S7. Dehydration of Di-HAF to 3A5AF.....                                                          | 3        |
| S8. H/D-exchange NMR experiment.....                                                             | 3        |
| S9. Preparation of a mixture (R)-Di-HAF and (S)-Di-HAF for chiral HPLC method development .      | 4        |
| <b>Characterization of Di-HAF .....</b>                                                          | <b>5</b> |
| S10. HRMS of Di-HAF .....                                                                        | 5        |
| S11. <sup>1</sup> H-NMR spectrum of Di-HAF (D <sub>2</sub> O) .....                              | 6        |
| S12. <sup>13</sup> C-NMR spectrum of Di-HAF (D <sub>2</sub> O) .....                             | 7        |
| S13. Chiral HPLC analysis Di-HAF (5 g scale) .....                                               | 8        |
| S14. DSC Di-HAF .....                                                                            | 8        |
| S15. IR spectrum Di-HAF .....                                                                    | 9        |
| S16. <sup>1</sup> H-NMR spectrum of N-acetylglucosamine (pyridine- <i>d</i> <sub>5</sub> ) ..... | 10       |

### Materials and methods

#### S1. Reagents

All reagents were acquired from commercial sources and used without further purification. Specifically, N-acetyl-D-glucosamine was purchased from Carbosynth Ltd, Silica gel (ultra pure, 40-60  $\mu$ m, 60A) and molecular sieves (3 Å, powder <50  $\mu$ m) from Acros Organics, Celite 535 from Carl Roth and phenylboronic acid from AmBeed. Thin-layer chromatography (TLC) was carried out on Merck silica gel 60 F254 aluminum plates. Visualization of compounds by TLC was done by potassium permanganate stain.

#### S2. Apparatus

<sup>1</sup>H-NMR and <sup>13</sup>C-NMR analyses were performed on a Bruker Avance NEO (400 MHz) at 25 °C. High-resolution mass spectrometry (HRMS) was performed on a Thermo Scientific LTQ Orbitrap XL (FTMS). Infrared spectra (IR) spectra were recorded on a Nicolet 380 FT-IR of Thermo Electron corporation. DSC was recorded on a TA instruments DSC Q20 and enantiomeric excess (*ee*) was determined by chiral HPLC on a waters Acquity UPC<sup>2</sup>.

### S3. Chiral LC method

|                    |                                                                            |
|--------------------|----------------------------------------------------------------------------|
| Chiral SFC Method  | : 31875A UPC <sup>2</sup> 5m AMY MA1                                       |
| System             | : Waters Acquity UPC <sup>2</sup> system with UV detector and QDA detector |
| Column             | : Acquity UPC <sup>2</sup> Trefoil AMY (3.0 x 150 mm; 2.5 $\mu$ m)         |
| Mobile Phase A     | : CO <sub>2</sub>                                                          |
| Mobile Phase B     | : 0.2% Ammonia in MeOH                                                     |
| Pump Flow          | : 2.5 mL/Min                                                               |
| UV detection       | : 240 nm                                                                   |
| Injection Volume   | : 1.0 $\mu$ L                                                              |
| Total Run Time     | : 5.0 Min                                                                  |
| Column Temperature | : 40 °C                                                                    |
| ABPR               | : 2500 psi                                                                 |
| Mass Detection     | : MS Scan ES positive and negative                                         |
| Mass Range         | : 100 – 1250 Da                                                            |
| Pump Program       | : Gradient                                                                 |

| Time (Min) | %A   | %B   | Curve   |
|------------|------|------|---------|
| Initial    | 98.0 | 2.0  | initial |
| 4.0        | 75.0 | 25.0 | 6       |
| 4.1        | 98.0 | 2.0  | 6       |

## Experimental procedures

### S4. Synthesis of Di-HAF on 5 g scale

**(R)-N-(5-(1,2-Dihydroxyethyl)furan-3-yl)acetamide (Di-HAF).** Triflic acid (3.4 g, 2.0 mL, 1 eq, 23 mmol) was added to a suspension of N-acetylglucosamine (**GlcNAc**) (5.0 g, 1 eq, 23 mmol), phenylboronic acid (4.1 g, 1.5 eq, 34 mmol) and molecular sieves (3 Å, powdered, 25 g) in pyridine (125 mL). The flask was flushed with nitrogen and heated to reflux (116 °C). After 30 min the mixture was cooled down to room temperature. Pinacol (5.3 g, 2 eq, 45 mmol) and potassium carbonate (6.2 g, 2 eq, 45 mmol) were added and stirring was continued for 30 min. The mixture was poured into a stirred suspension of silica (15 g) in heptanes (1.2 L) and the suspension was filtered over a patch of silica (ca. 350 mL silica). The residue was washed with heptanes (1 L), ethyl acetate (1 L) and subsequently with dichloromethane-methanol (9 : 1, 2 L). The dichloromethane-methanol solution was concentrated in vacuo to afford a brown oil (4.06 g). The crude was crystallized from acetonitrile (20 mL) to afford Di-HAF as a light brown solid (3.05 g, 16 mmol, yield: 73%, 99.3% *ee*, see S3). <sup>1</sup>H-NMR (400 MHz, D<sub>2</sub>O)  $\delta$  7.74 (s, 1H), 6.31 (s, 1H), 4.65 (t, J = 6.0 Hz, 1H), 3.80 – 3.68 (m, 2H), 2.02 (s, 3H). <sup>13</sup>C-NMR (100 MHz, D<sub>2</sub>O)  $\delta$  171.93, 152.55, 132.64, 124.27, 102.97, 67.36, 63.27, 21.95. HRMS (ESI) calculated for C<sub>8</sub>H<sub>11</sub>NO (M+H<sup>+</sup>): 186.07608; found (M+H<sup>+</sup>): 186.07620 (see S10)

### S5. Synthesis of Di-HAF on 50 g scale

**(R)-N-(5-(1,2-Dihydroxyethyl)furan-3-yl)acetamide (Di-HAF).** Triflic acid (33.9 g, 20.1 mL, 1 eq, 226 mmol) was added to a suspension of N-acetylglucosamine (**GlcNAc**) (50.0 g, 1 eq, 226 mmol), phenylboronic acid (41.3 g, 1.5 eq, 339 mmol) and molecular sieves (3 Å, powdered, 250 g) in pyridine (1.25 L). The flask was flushed with nitrogen and heated to reflux (116 °C). After 30 min the mixture was cooled down to room temperature. Pinacol (53.4 g, 2 eq, 452 mmol) and potassium carbonate (62.5 g, 2 eq, 452 mmol) were added and stirring was continued for 30 min. The mixture was filtered over celite (1 cm) and the residue was washed with pyridine (0.5 L). The filtrate was concentrated in vacuo (40 °C) to a volume of approximately 0.5 L and poured into a suspension of silica (150 g) in heptane (4 L). The suspension was filtered over a patch of silica (ca. 350 mL silica). The residue was

washed with heptanes (1 L), ethyl acetate (4 L) and subsequently with dichloromethane-methanol (9:1, 8 L). The dichloromethane-methanol solution was concentrated *in vacuo* to afford a brown oil (44 g). The crude was crystallized from acetonitrile (150 mL) to afford **Di-HAF** as a light brown solid (30.5 g, 165 mmol, yield: 73%, 99% ee). <sup>1</sup>H-NMR (400 MHz, D<sub>2</sub>O) δ 7.74 (s, 1H), 6.31 (s, 1H), 4.65 (t, J = 6.0 Hz, 1H), 3.80 – 3.68 (m, 2H), 2.02 (s, 3H).

#### S6. Dehydration of ManAc to afford Di-HAF

**(R)-N-(5-(1,2-Dihydroxyethyl)furan-3-yl)acetamide (Di-HAF).** Triflic acid (3.4 g, 2.0 mL, 1 eq, 23 mmol) was added to a suspension of N-acetyl mannosamine (**ManAc**) (5.0 g, 1 eq, 23 mmol), phenylboronic acid (4.1 g, 1.5 eq, 34 mmol) and molecular sieves (3 Å, powdered, 25 g) in pyridine (125 mL). The flask was flushed with nitrogen and heated to reflux (116 °C). After 30 min the mixture was cooled down to room temperature. Pinacol (5.3 g, 2 eq, 45 mmol) and potassium carbonate (6.2 g, 2 eq, 45 mmol) were added and stirring was continued for 30 min. The mixture was poured into a stirred suspension of silica (15 g) in heptane (1.2 L) and the suspension was filtered over a patch of silica (ca. 350 mL silica). The residue was washed with heptane (1 L), ethyl acetate (1 L) and subsequently with dichloromethane-methanol (9 : 1, 2 L). The dichloromethane-methanol solution was concentrated *in vacuo* to afford a brown oil (4.1 g). The crude was crystallized from acetonitrile (20 mL) to afford **Di-HAF** as a light brown solid (1.3 g, 6.8 mmol, yield: 33%). <sup>1</sup>H-NMR (400 MHz, D<sub>2</sub>O) δ 7.74 (s, 1H), 6.31 (s, 1H), 4.65 (t, J = 6.0 Hz, 1H), 3.80 – 3.68 (m, 2H), 2.02 (s, 3H) (NMR data were identical to those obtained starting from GlucNAc).

#### S7. Dehydration of Di-HAF to 3A5AF

**N-(5-acetylfuran-3-yl)acetamide (3A5AF).** A suspension of (R)-N-(5-(1,2-dihydroxyethyl)furan-3-yl)acetamide (**Di-HAF**) (500 mg, 2.7 mmol, 1 eq.) and pyridine hydrochloride (624 mg, 5.4 mmol, 2 eq.) in pyridine (10 mL) was heated to reflux temperature (116 °C) under a nitrogen atmosphere. The mixture was stirred for 3 hours. The volatiles were removed *in vacuo* (45 °C) and the crude was purified by automated column chromatography (silica; DCM/MeOH) to afford N-(5-acetylfuran-3-yl)acetamide (**3A5AF**) as a beige solid (290 mg, 1.73 mmol, yield: 64%). <sup>1</sup>H-NMR (400 MHz, DMSO-d<sub>6</sub>) δ 10.21 (s, 1H), 8.17 (s, J = 0.9 Hz, 1H), 7.18 (s, J = 0.8 Hz, 1H), 2.40 (s, 3H), 2.02 (s, 3H) (spectroscopic data corresponded to literature<sup>13</sup>).

#### S8. H/D-exchange NMR experiment

**(R)-N-(5-(1,2-dihydroxyethyl)furan-3-yl-2-d)acetamide-d<sub>1</sub> (Di-HAF-d<sub>1</sub>).** (R)-N-(5-(1,2-Dihydroxyethyl)furan-3-yl)acetamide (**Di-HAF**) (20 mg, 0.11 mmol, 1 eq.) was dissolved in deuterium oxide (0.6 mL) and acetic acid was added (6.5 mg, 0.11 mmol, 1.0 eq.). The mixture was kept at room temperature for 24 hours. <sup>1</sup>H-NMR showed complete disappearance of the signal at 7.7 ppm, corresponding to the C2 position of the furan ring. <sup>1</sup>H-NMR (400 MHz, D<sub>2</sub>O) δ 6.31 (s, 1H), 4.65 (t, J = 6.4, 5.6, 0.6 Hz, 1H), 3.80 – 3.68 (m, 2H), 2.03 (s, 3H).

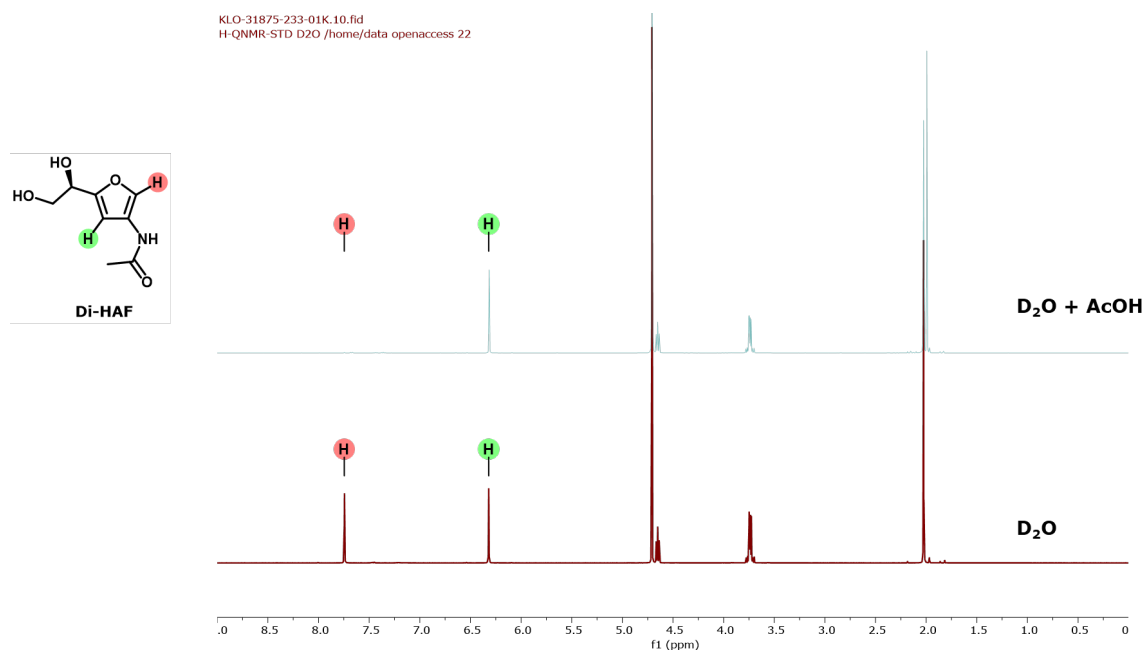

### S9. Preparation of a mixture (R)-Di-HAF and (S)-Di-HAF for chiral HPLC method development

**(R/S)-N-(5-(1,2-dihydroxyethyl)furan-3-yl-2-d)acetamide.** Diisopropyl azodicarboxylate (**DIAD**) (682 mg, 656  $\mu$ L, 2.5 eq, 3.38 mmol) was added to a stirred suspension of N-(5-(1,2-dihydroxyethyl)furan-3-yl)acetamide (**Di-HAF**) (250 mg, 1 eq, 1.35 mmol), triphenylphosphine (885 mg, 2.5 eq, 3.38 mmol) and TFA (462 mg, 312  $\mu$ L, 3 eq, 4.05 mmol) in THF (15 mL). The temperature was kept below 30 °C. A solution was obtained which was stirred for 30 minutes. A mixture of methanol (10 mL) and K<sub>2</sub>CO<sub>3</sub> (933 mg, 5 eq, 6.75 mmol) was added and stirring was continued for an additional hour. The reaction mixture was concentrated *in vacuo* (45 °C) and the crude product was purified by automated column chromatography to afford a mixture of enantiomers (46:54) as an orange oil (75 mg, yield: 30%).

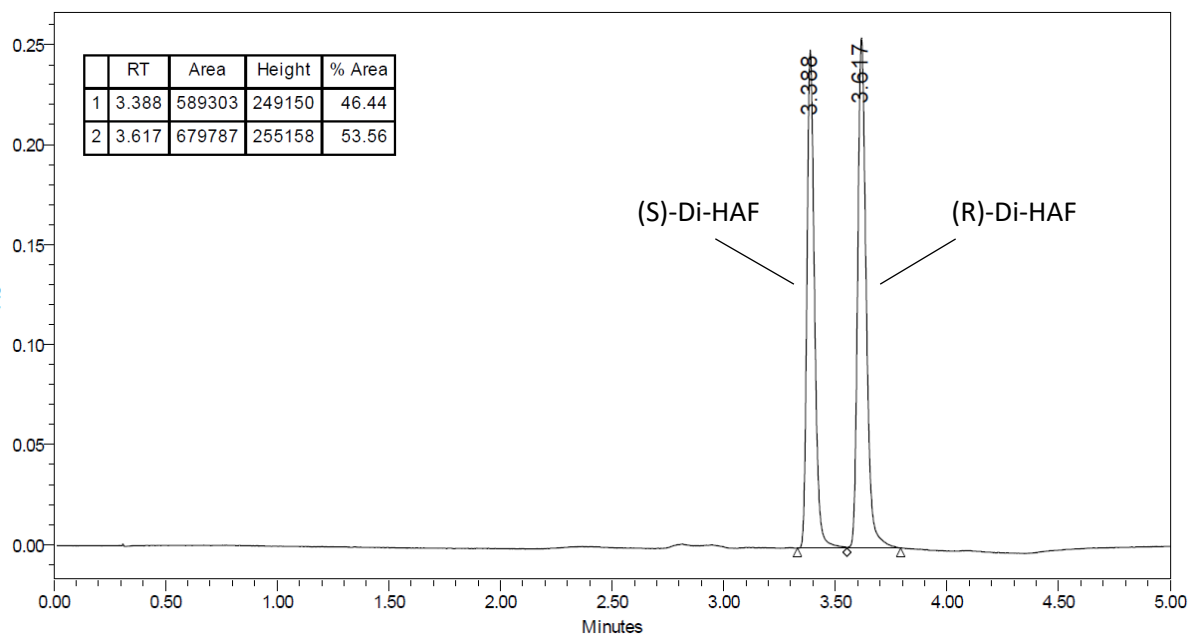

# Characterization of Di-HAF

## S10. HRMS of Di-HAF

DI-HAF

ESI pos

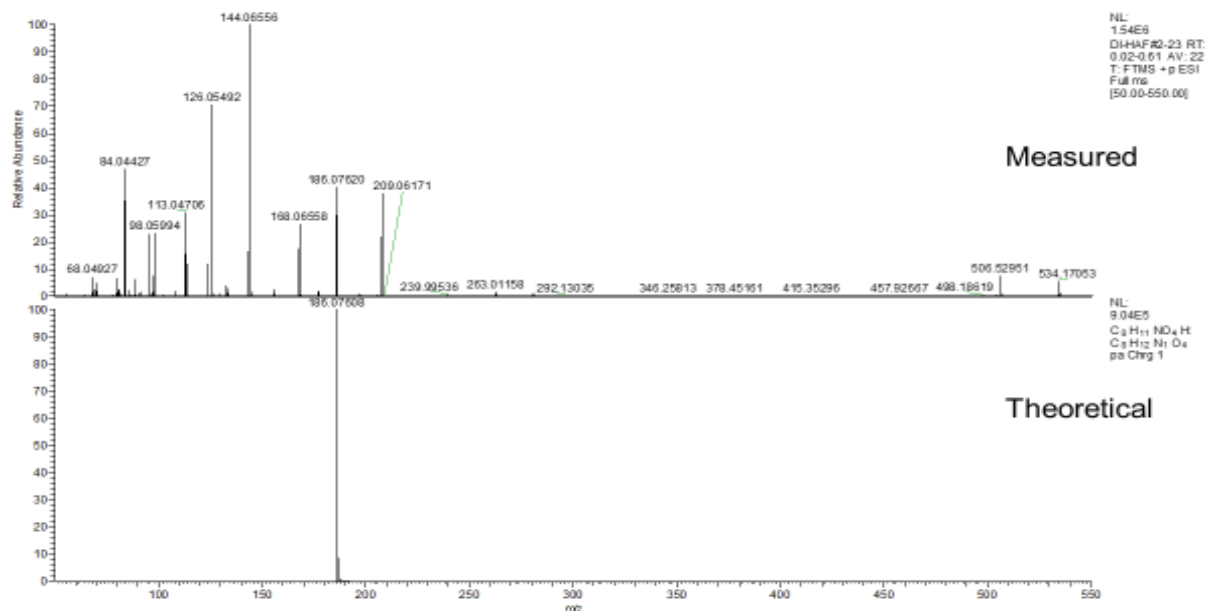

Zoomed in

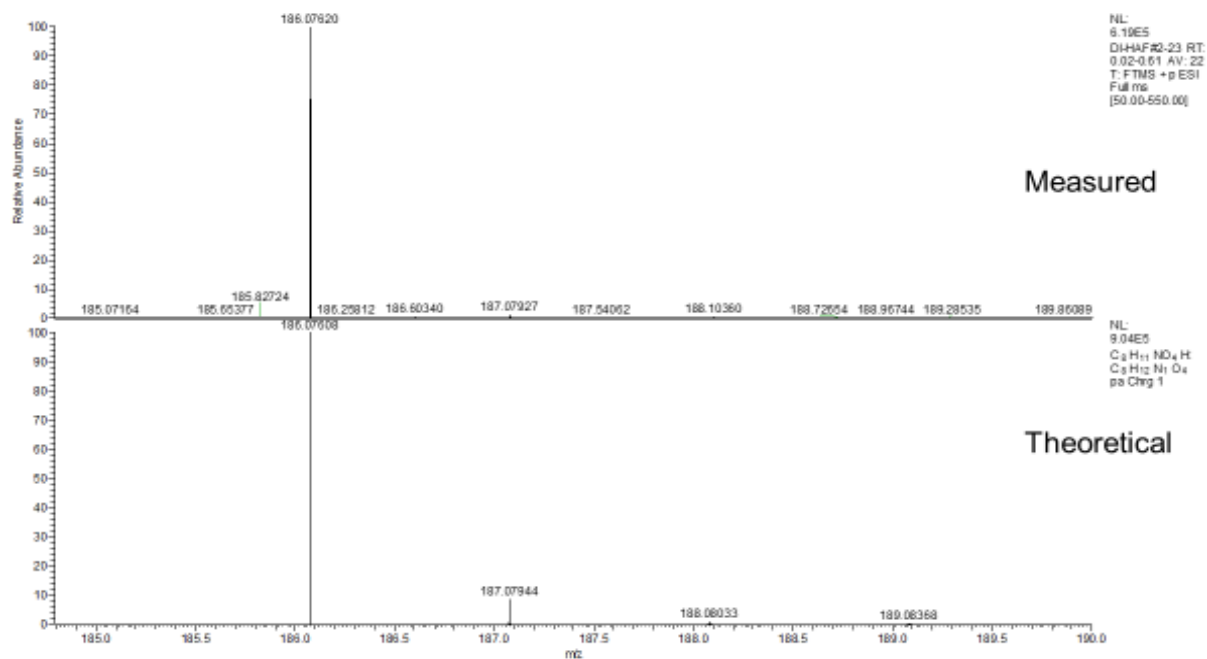

S11.  $^1\text{H}$ -NMR spectrum of Di-HAF ( $\text{D}_2\text{O}$ )

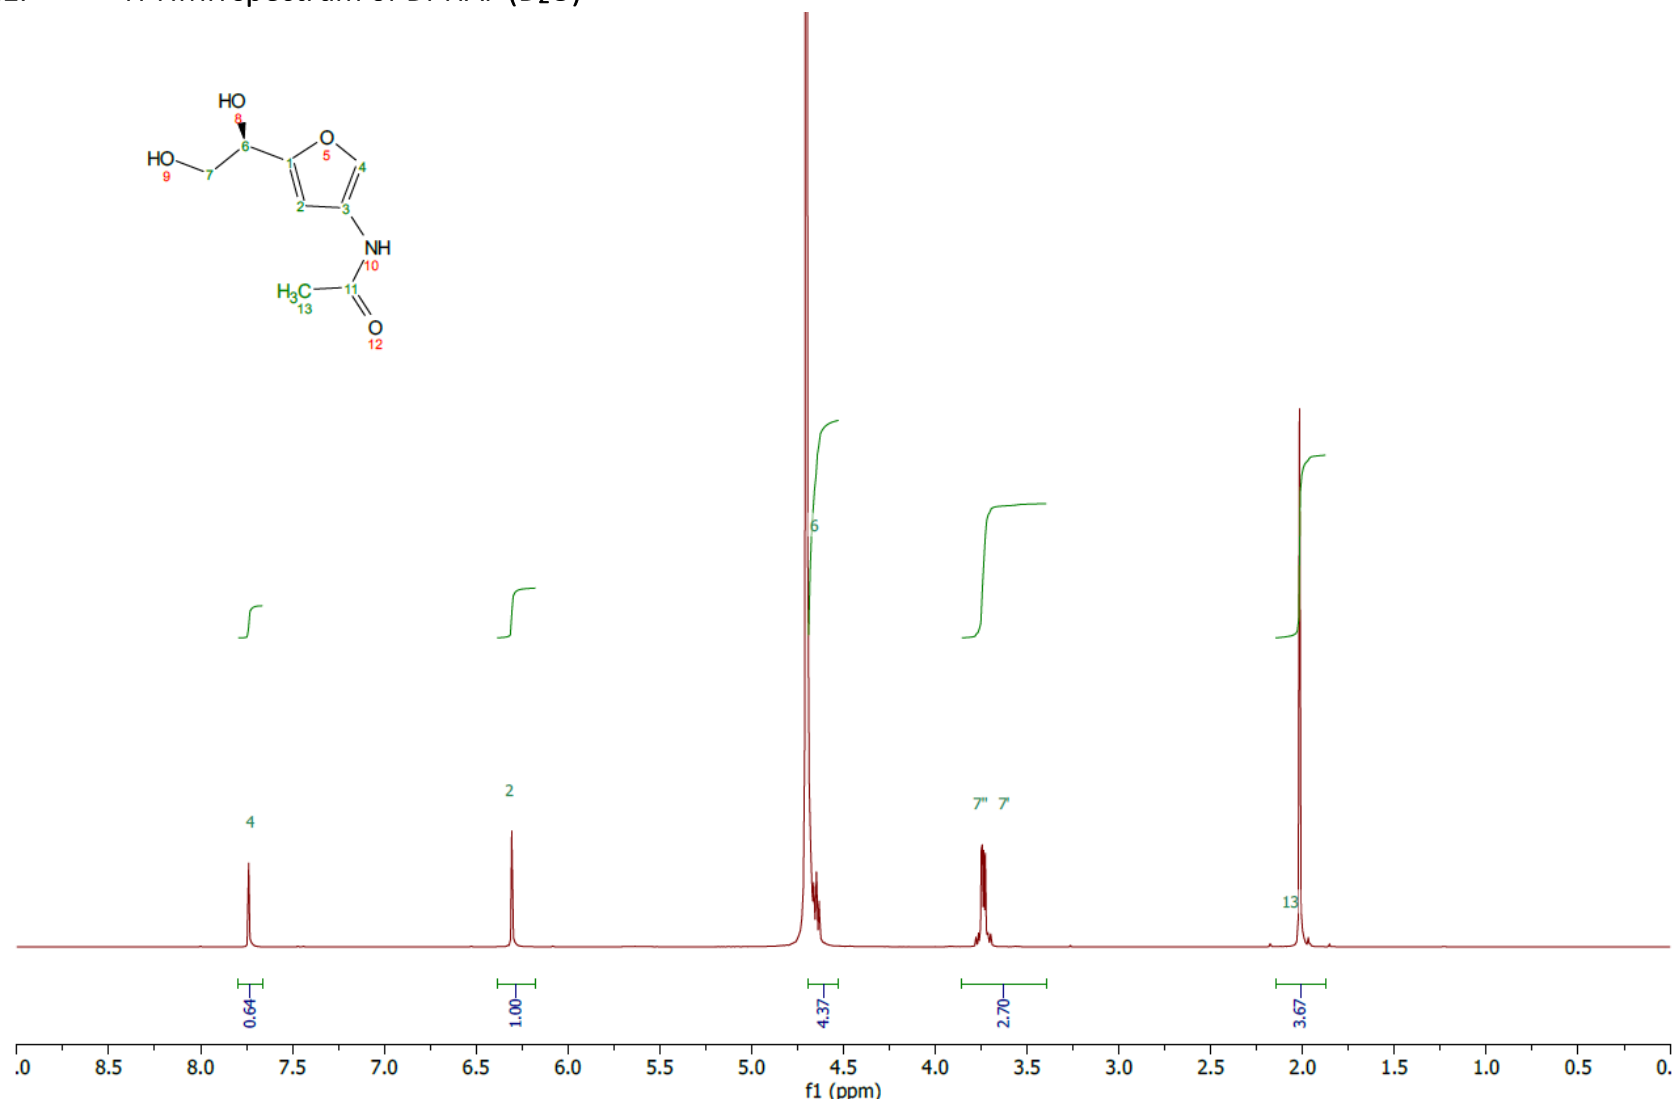

S12.  $^{13}\text{C}$ -NMR spectrum of Di-HAF ( $\text{D}_2\text{O}$ )

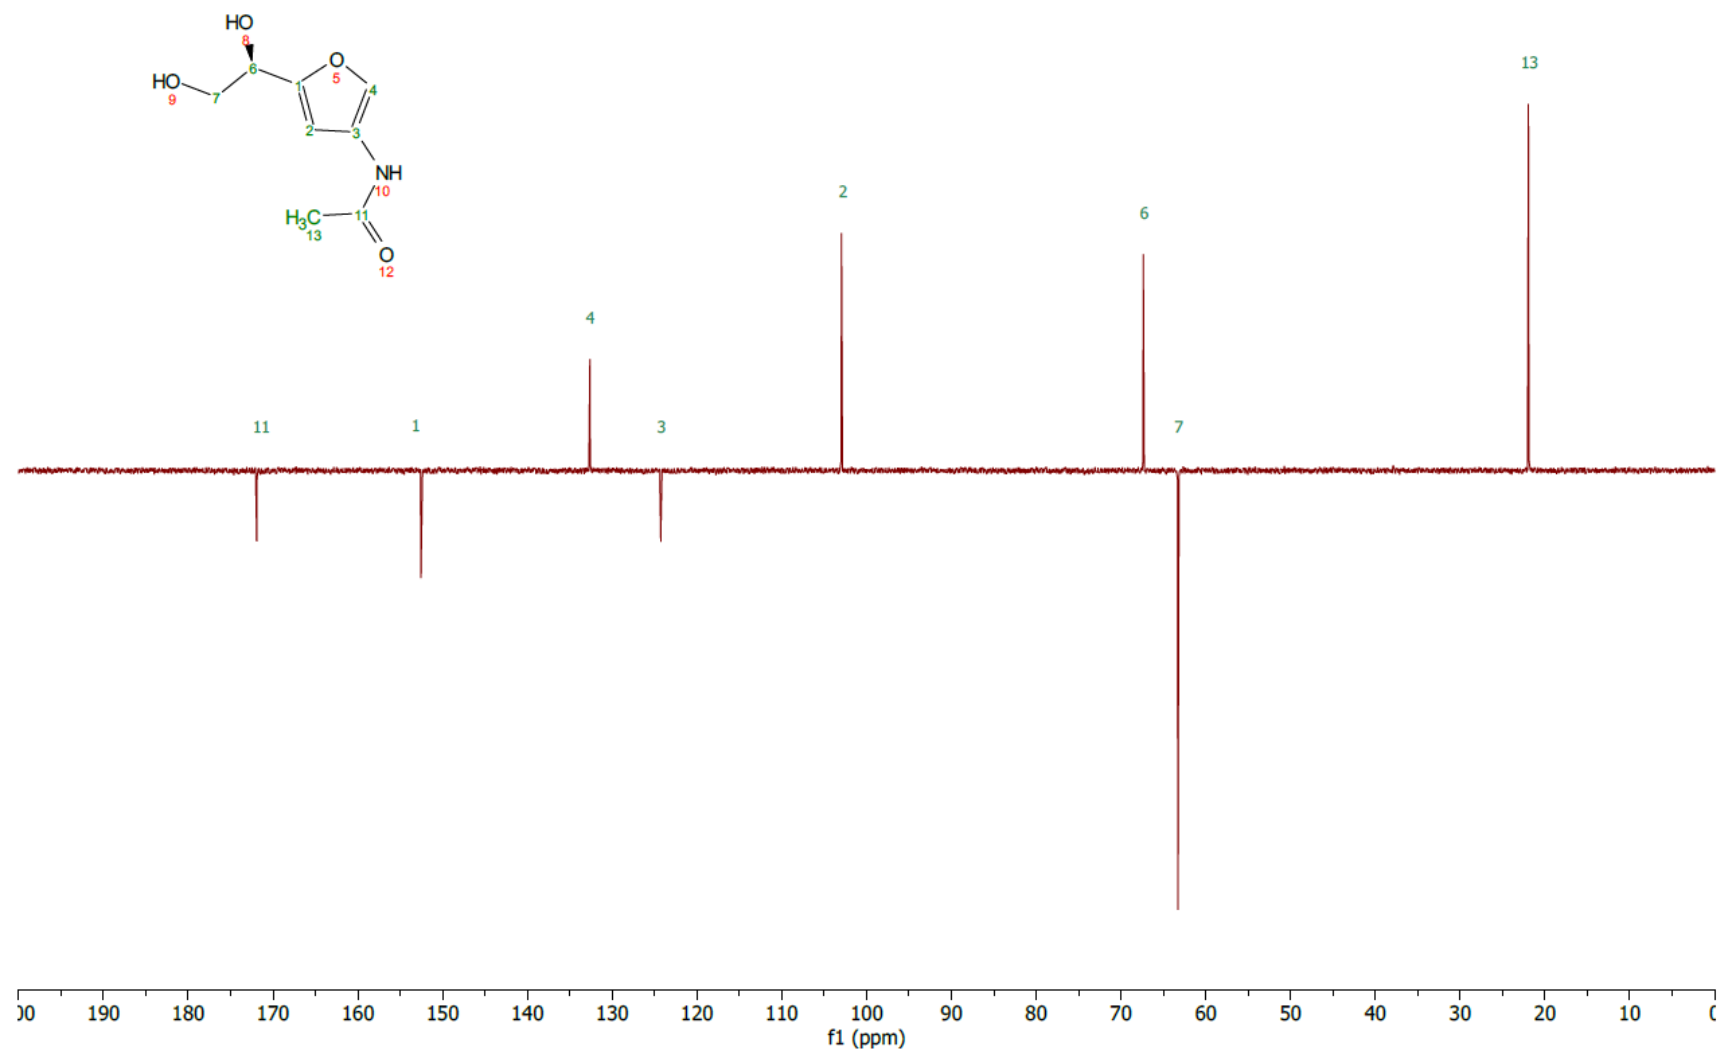

### S13. Chiral HPLC analysis Di-HAF (5 g scale)

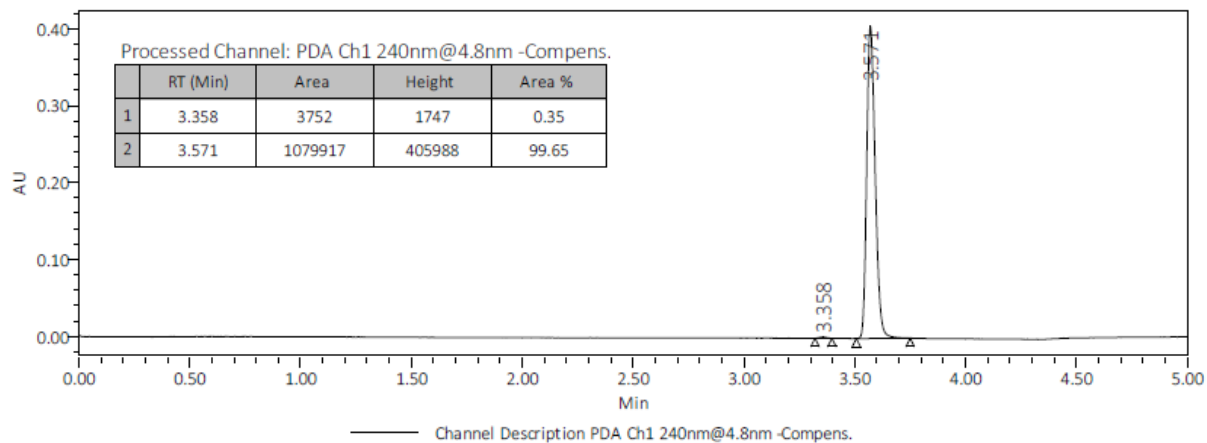

### S14. DSC Di-HAF

Sample: KLO31875-162-03  
Size: 1.4900 mg  
Method: 28-300/10/N2

DSC

File: \\...\\Data\\DSC\\2021\\February\\210203.001  
Operator: HML  
Run Date: 03-Feb-2021 10:29  
Instrument: DSC Q20 V24.11 Build 124

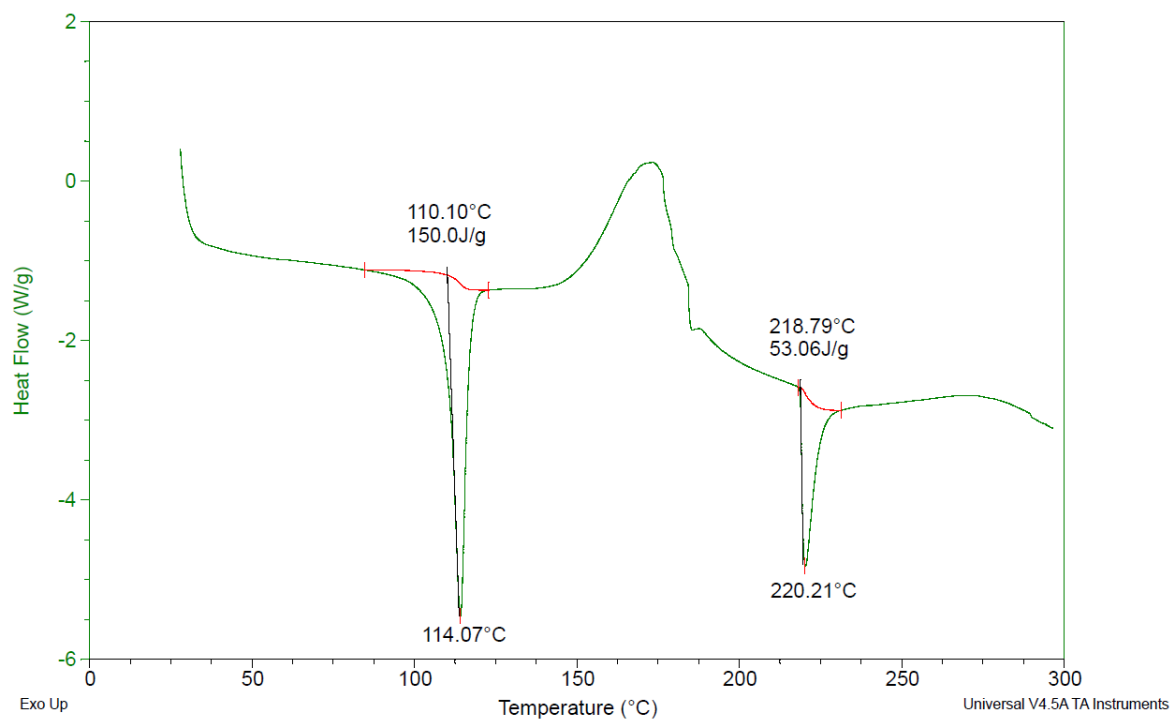



S15. IR spectrum Di-HAF

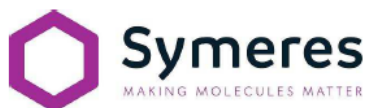

**Confidential**

Number of sample scans: 32  
 Number of background scans: 32  
 Resolution: 4.000  
 Sample gain: 8.0  
 Mirror velocity: 0.6329  
 Aperture: 100.00

Detector: DTGS KBr  
 Beamsplitter: KBr  
 Source: IR

Comment:

Title: KLO31875-162-04

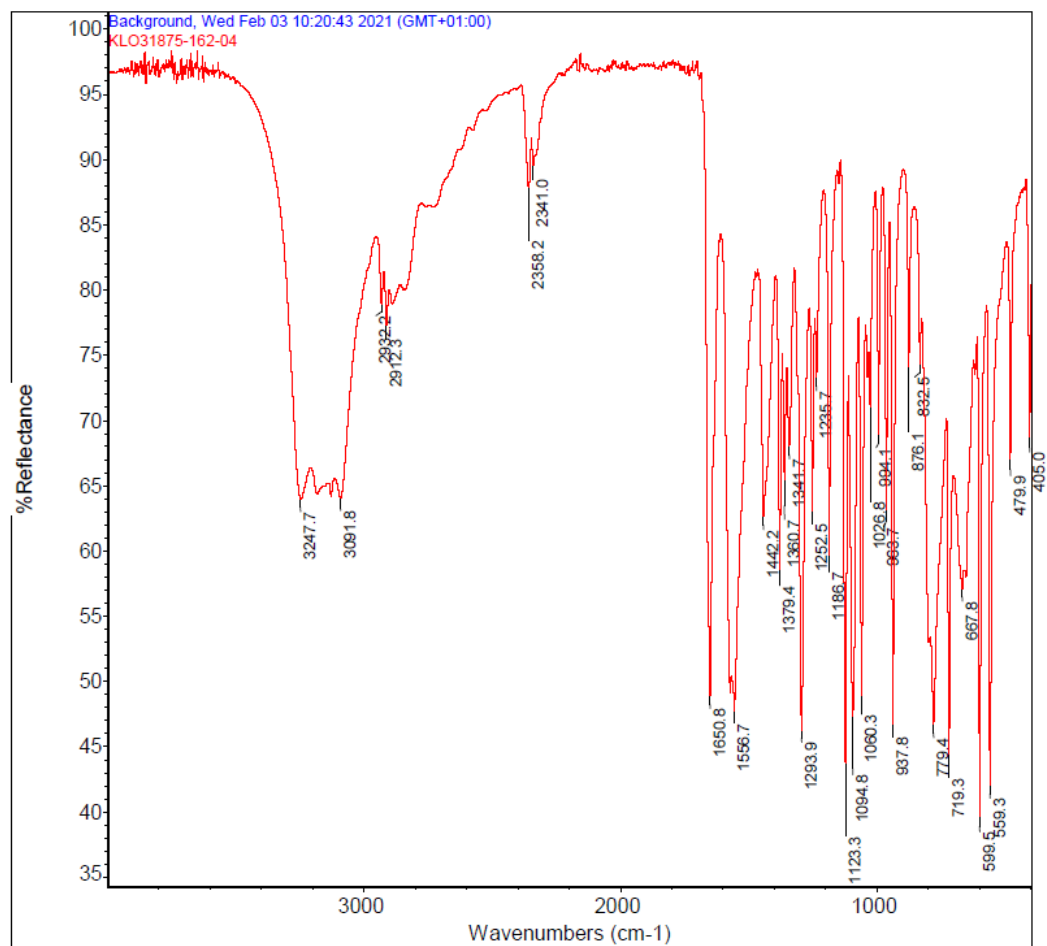

S16.  $^1\text{H}$ -NMR spectrum of N-acetylglucosamine (pyridine- $d_5$ )

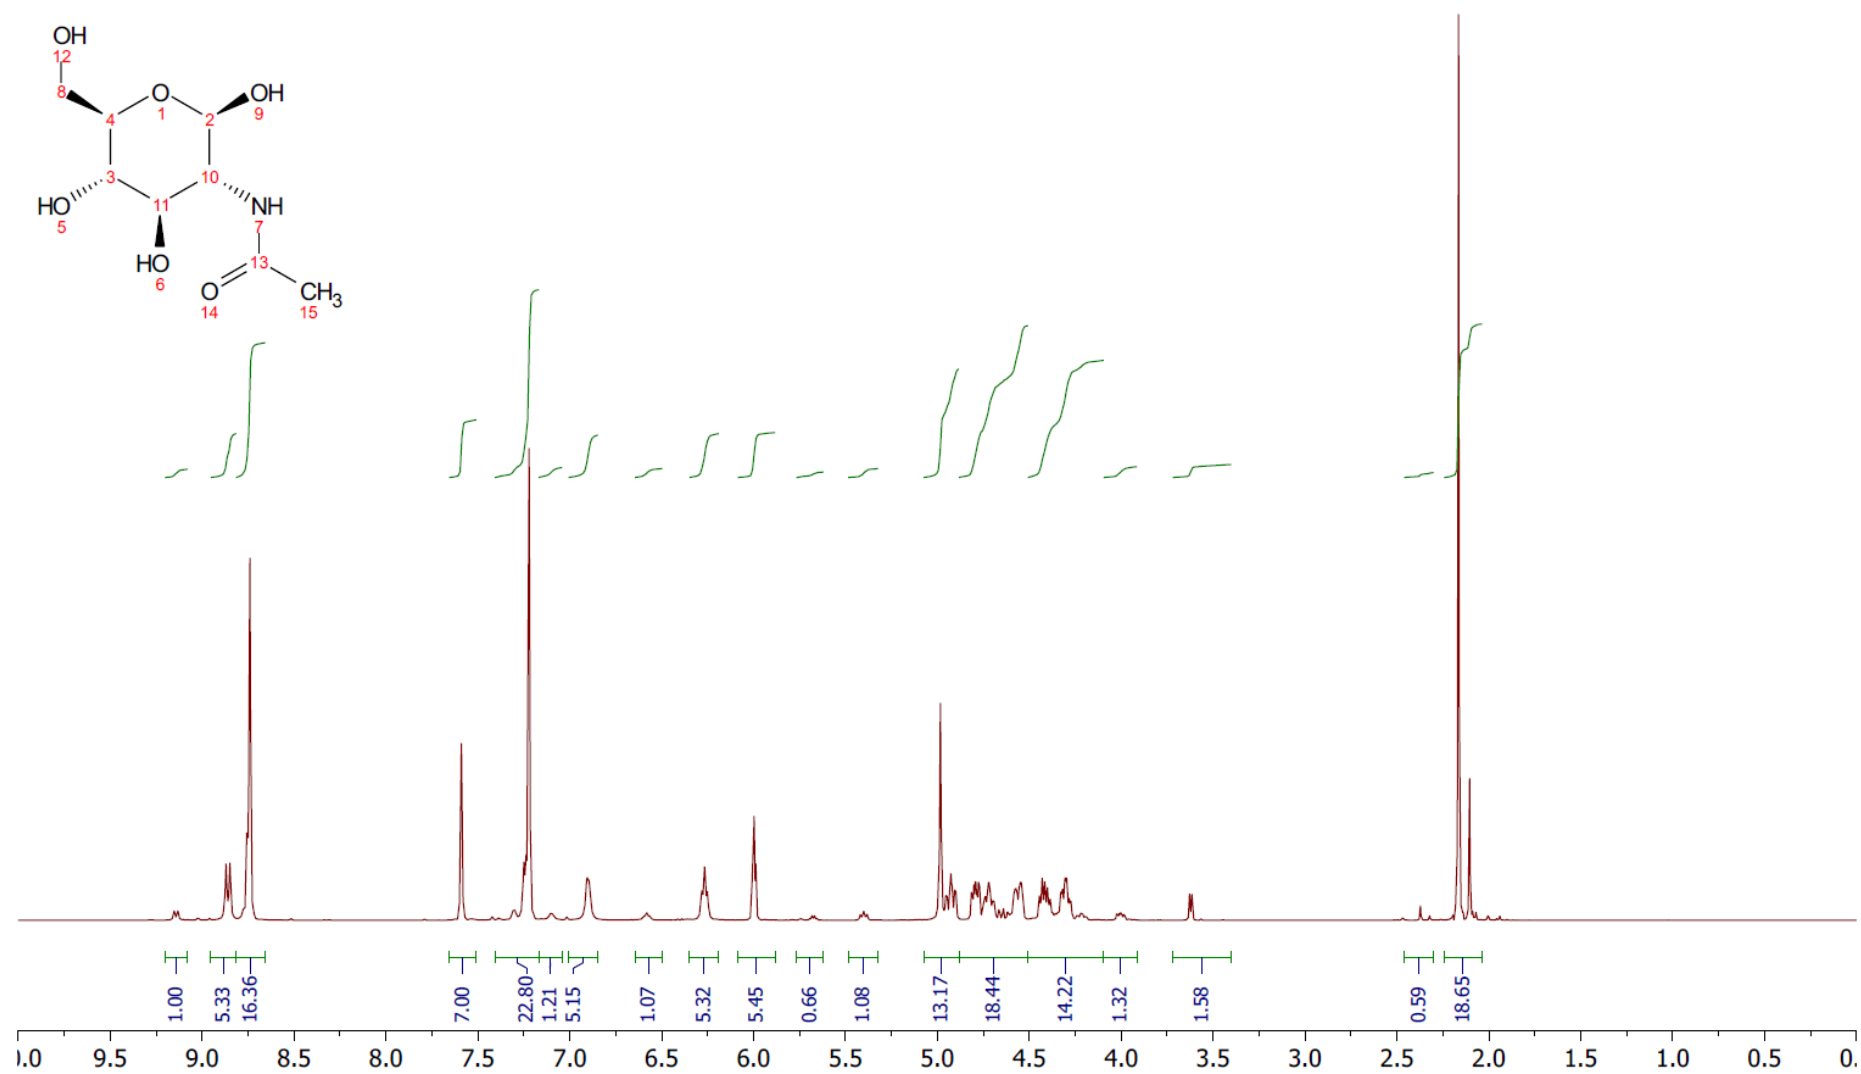

Supplement: d1ob02004h1.pdf [file d1ob02004h1.pdf]
